# Supplementary material
Source: PubMed Central journal article supplement (PMC3282391)
Supplement: hdy201167x1.pdf [file hdy201167x1.pdf]

| Locality                 | Species             | Hp   | Ac. num. | Ac. num.* | M | N     | E     | S  | Lgt                              |
|--------------------------|---------------------|------|----------|-----------|---|-------|-------|----|----------------------------------|
| Lebanon                  | <i>E. concolor</i>  | EC01 | HM462031 | -         | + | 34,03 | 35,08 | RK | Horáček Ivan                     |
| Turkey - Akseki          | <i>E. concolor</i>  | EC02 | HM462032 | -         | + | 37,03 | 47,78 | RK | Gvoždík Václav                   |
| Turkey - Hatay, Karacay  | <i>E. concolor</i>  | -    | -        | -         | + | 36,45 | 36,25 | RK | Baláž Vojtěch, Balážová Alena    |
| Beřovice                 | <i>E. europaeus</i> | EE01 | HM462033 | -         | + | 50,27 | 14,12 | RK | Lučan Radek                      |
| Česká Lípa               | <i>E. europaeus</i> | EE01 | HM462033 | -         | + | 50,68 | 14,53 | RC | ZS Falco Dolní Týnec             |
| Doksy u České Lípy       | <i>E. europaeus</i> | EE01 | HM462033 | -         | + | 50,55 | 14,65 | RC | ZS Falco Dolní Týnec             |
| Havlíčkův Brod           | <i>E. europaeus</i> | EE01 | HM462033 | -         | - | 49,60 | 15,56 | RC | ZS Pavlov                        |
| Holé vrchy               | <i>E. europaeus</i> | EE01 | HM462033 | -         | + | 50,38 | 14,97 | C  | Bolfíková Barbora                |
| Horní Lhota              | <i>E. europaeus</i> | EE01 | HM462033 | -         | - | 49,88 | 18,00 | RK | Gvoždík Václav                   |
| Hustopeče                | <i>E. europaeus</i> | EE01 | HM462033 | -         | + | 48,93 | 16,73 | RK | Pithartová Tereza                |
| Chocerady                | <i>E. europaeus</i> | EE01 | HM462033 | -         | + | 49,87 | 14,82 | RC | ZS Vlašim                        |
| Chomutov                 | <i>E. europaeus</i> | EE01 | HM462033 | -         | + | 50,45 | 13,40 | RC | Zoopark Chomutov                 |
| Jičín - Sedličky         | <i>E. europaeus</i> | EE01 | HM462033 | -         | + | 50,43 | 15,37 | RK | Šandera Martin                   |
| Litoměřice               | <i>E. europaeus</i> | EE01 | HM462033 | -         | + | 50,53 | 14,12 | RC | ZS Falco Dolní Týnec             |
| Litoměřice               | <i>E. europaeus</i> | EE01 | HM462033 | -         | + | 50,53 | 14,12 | RC | ZS Falco Dolní Týnec             |
| Litoměřice               | <i>E. europaeus</i> | EE01 | HM462033 | -         | + | 50,53 | 14,12 | RC | ZS Falco Dolní Týnec             |
| Miřetice u Hlinska       | <i>E. europaeus</i> | EE01 | HM462033 | -         | + | 49,83 | 15,88 | RC | ZS Pavlov                        |
| Olomouc                  | <i>E. europaeus</i> | EE01 | HM462033 | -         | + | 49,58 | 17,25 | RC | Zoo Olomouc                      |
| Olomouc                  | <i>E. europaeus</i> | EE01 | HM462033 | -         | + | 49,58 | 17,25 | RC | Zoo Olomouc                      |
| Praha - Petrovice        | <i>E. europaeus</i> | EE01 | HM462033 | -         | - | 50,03 | 14,55 | RK | Baláž Vojtěch, Balážová Alena    |
| Praha - Trója            | <i>E. europaeus</i> | EE01 | HM462033 | -         | + | 50,12 | 14,42 | RK | Pithartová Tereza                |
| Roudnice nad Labem       | <i>E. europaeus</i> | EE01 | HM462033 | -         | + | 50,42 | 14,25 | RC | ZS Falco Dolní Týnec             |
| Štětí                    | <i>E. europaeus</i> | EE01 | HM462033 | -         | + | 50,45 | 14,37 | RC | ZS Falco Dolní Týnec             |
| Žleby                    | <i>E. europaeus</i> | EE01 | HM462033 | -         | + | 49,88 | 15,48 | RK | Kaftan Milan, Švátora Miroslav   |
| Bochov                   | <i>E. europaeus</i> | EE02 | HM462034 | AF379709  | + | 50,13 | 13,03 | RK | Průšová                          |
| Frydek Místek            | <i>E. europaeus</i> | EE02 | HM462034 | AF379709  | + | 49,68 | 18,33 | RC | ZS Nový Jičín                    |
| Germany - Hamburk        | <i>E. europaeus</i> | EE02 | HM462034 | AF379709  | + | 53,55 | 9,98  | RC | Petney Trevor                    |
| Germany - Hesse-Brachtal | <i>E. europaeus</i> | EE02 | HM462034 | AF379709  | + | 50,30 | 9,28  | RC | Petney Trevor                    |
| Germany - Karlsruhe      | <i>E. europaeus</i> | EE02 | HM462034 | AF379709  | + | 49,00 | 8,40  | RC | Petney Trevor                    |
| Germany - Stocksberg     | <i>E. europaeus</i> | EE02 | HM462034 | AF379709  | + | 49,06 | 9,04  | RC | Petney Trevor                    |
| Germany - Stocksberg     | <i>E. europaeus</i> | EE02 | HM462034 | AF379709  | + | 49,06 | 9,04  | RC | Petney Trevor                    |
| Golčův Jeníkov           | <i>E. europaeus</i> | EE02 | HM462034 | AF379709  | + | 49,80 | 15,47 | RC | ZS Pavlov                        |
| Golčův Jeníkov           | <i>E. europaeus</i> | EE02 | HM462034 | AF379709  | + | 49,80 | 15,47 | RC | ZS Pavlov                        |
| Golčův Jeníkov           | <i>E. europaeus</i> | EE02 | HM462034 | AF379709  | + | 49,80 | 15,47 | RC | ZS Pavlov                        |
| Golčův Jeníkov           | <i>E. europaeus</i> | EE02 | HM462034 | AF379709  | + | 49,80 | 15,47 | RC | ZS Pavlov                        |
| Hluboká nad Vltavou      | <i>E. europaeus</i> | EE02 | HM462034 | AF379709  | + | 49,05 | 14,42 | RK | Koláčková Karolína, Brandl Pavel |
| Chomutov                 | <i>E. europaeus</i> | EE02 | HM462034 | AF379709  | + | 50,45 | 13,40 | RC | Zoopark Chomutov                 |
| Chomutov                 | <i>E. europaeus</i> | EE02 | HM462034 | AF379709  | + | 50,45 | 13,40 | RC | Zoopark Chomutov                 |
| Klimkovice               | <i>E. europaeus</i> | EE02 | HM462034 | AF379709  | + | 50,18 | 18,12 | RC | ZS Nový Jičín                    |
| Klimkovice               | <i>E. europaeus</i> | EE02 | HM462034 | AF379709  | + | 49,78 | 18,12 | RC | ZS Nový Jičín                    |
| Ledeč nad Sázavou        | <i>E. europaeus</i> | EE02 | HM462034 | AF379709  | - | 49,68 | 15,27 | RC | ZS Pavlov                        |
| Liběchov                 | <i>E. europaeus</i> | EE02 | HM462034 | AF379709  | + | 50,40 | 14,43 | C  | Gvoždík Václav                   |
| Litoměřice               | <i>E. europaeus</i> | EE02 | HM462034 | AF379709  | + | 50,53 | 14,12 | RC | ZS Falco Dolní Týnec             |
| Litoměřice               | <i>E. europaeus</i> | EE02 | HM462034 | AF379709  | - | 50,53 | 14,12 | RC | ZS Falco Dolní Týnec             |
| Litoměřice               | <i>E. europaeus</i> | EE02 | HM462034 | AF379709  | + | 50,53 | 14,12 | RC | ZS Falco Dolní Týnec             |
| Olomouc                  | <i>E. europaeus</i> | EE02 | HM462034 | AF379709  | + | 49,58 | 17,25 | RC | Zoo Olomouc                      |
| Opava                    | <i>E. europaeus</i> | EE02 | HM462034 | AF379709  | + | 49,93 | 17,90 | RC | ZS Nový Jičín                    |
| Ostrava - Svinov         | <i>E. europaeus</i> | EE02 | HM462034 | AF379709  | + | 49,82 | 18,18 | C  | Bolfíková Barbora                |
| Ostrava - Svinov         | <i>E. europaeus</i> | EE02 | HM462034 | AF379709  | - | 49,82 | 18,18 | C  | Bolfíková Barbora                |

|                           |                     |             |          |          |   |       |       |    |                                              |
|---------------------------|---------------------|-------------|----------|----------|---|-------|-------|----|----------------------------------------------|
| Ostrava - Svinov          | <i>E. europaeus</i> | <b>EE02</b> | HM462034 | AF379709 | + | 49,82 | 18,18 | RK | Bolfíková Barbora                            |
| Počátky                   | <i>E. europaeus</i> | <b>EE02</b> | HM462034 | AF379709 | + | 45,25 | 15,23 | RC | ZS Vlašim                                    |
| Praha 9                   | <i>E. europaeus</i> | <b>EE02</b> | HM462034 | AF379709 | + | 50,12 | 14,48 | RC | Dvorská Zdena                                |
| Rožnov pod Radhoštěm      | <i>E. europaeus</i> | <b>EE02</b> | HM462034 | AF379709 | + | 49,45 | 18,13 | RC | ZS Nový Jičín                                |
| Tábor                     | <i>E. europaeus</i> | <b>EE02</b> | HM462034 | AF379709 | + | 49,42 | 14,65 | RC | Dvorská Zdena                                |
| Velké Meziříčí            | <i>E. europaeus</i> | <b>EE02</b> | HM462034 | AF379709 | + | 49,35 | 15,93 | RC | ZS Pavlov                                    |
| Benešov                   | <i>E. europaeus</i> | <b>EE03</b> | HM462035 | AF379713 | + | 49,78 | 14,68 | RC | Dvorská Zdena                                |
| Český Těšín               | <i>E. europaeus</i> | <b>EE03</b> | HM462035 | AF379713 | + | 49,73 | 18,60 | RC | ZS Nový Jičín                                |
| Děčín - Březiny           | <i>E. europaeus</i> | <b>EE03</b> | HM462035 | AF379713 | + | 50,75 | 14,23 | RC | ZS Falco Dolní Týnec                         |
| Germany - Hamburk         | <i>E. europaeus</i> | <b>EE03</b> | HM462035 | AF379713 | + | 53,55 | 9,98  | RC | Petney Trevor                                |
| Germany - Hesse-Maintal   | <i>E. europaeus</i> | <b>EE03</b> | HM462035 | AF379713 | + | 50,15 | 8,82  | RC | Petney Trevor                                |
| Jesenice - Horní Říčany   | <i>E. europaeus</i> | <b>EE03</b> | HM462035 | AF379713 | + | 49,97 | 14,52 | RK | Bolfíková Barbora, Hulva Pavel, Kaftan Milan |
| Kamenice                  | <i>E. europaeus</i> | <b>EE03</b> | HM462035 | AF379713 | + | 49,88 | 14,57 | RC | ZS Vlašim                                    |
| Keřkov                    | <i>E. europaeus</i> | <b>EE03</b> | HM462035 | AF379713 | + | 49,58 | 15,72 | RK | Horáček Ivan                                 |
| Kolín                     | <i>E. europaeus</i> | <b>EE03</b> | HM462035 | AF379713 | + | 50,02 | 15,20 | RC | Dvorská Zdena                                |
| Nový Bor                  | <i>E. europaeus</i> | <b>EE03</b> | HM462035 | AF379713 | + | 50,75 | 14,53 | RC | ZS Falco Dolní Týnec                         |
| Olomouc                   | <i>E. europaeus</i> | <b>EE03</b> | HM462035 | AF379713 | - | 49,58 | 17,25 | RC | Zoo Olomouc                                  |
| Olomouc                   | <i>E. europaeus</i> | <b>EE03</b> | HM462035 | AF379713 | + | 49,58 | 17,25 | RC | Zoo Olomouc                                  |
| Olomouc                   | <i>E. europaeus</i> | <b>EE03</b> | HM462035 | AF379713 | + | 49,58 | 17,25 | RC | Zoo Olomouc                                  |
| Olomouc                   | <i>E. europaeus</i> | <b>EE03</b> | HM462035 | AF379713 | + | 49,58 | 17,25 | RC | Zoo Olomouc                                  |
| Olomouc                   | <i>E. europaeus</i> | <b>EE03</b> | HM462035 | AF379713 | + | 49,58 | 17,25 | RC | Zoo Olomouc                                  |
| Ostrava - Hrabová         | <i>E. europaeus</i> | <b>EE03</b> | HM462035 | AF379713 | + | 49,77 | 18,28 | RC | ZS Nový Jičín                                |
| Paskov                    | <i>E. europaeus</i> | <b>EE03</b> | HM462035 | AF379713 | + | 49,72 | 18,27 | RK | Bolfíková Barbora                            |
| Praha - Jižní Město       | <i>E. europaeus</i> | <b>EE03</b> | HM462035 | AF379713 | + | 50,02 | 14,48 | C  | Schneiderová Irena                           |
| Praha - Jižní Město       | <i>E. europaeus</i> | <b>EE03</b> | HM462035 | AF379713 | + | 50,02 | 14,48 | C  | Schneiderová Irena                           |
| Praha - Kunratice         | <i>E. europaeus</i> | <b>EE03</b> | HM462035 | AF379713 | + | 50,00 | 14,48 | RK | Bolfíková Barbora, Hulva Pavel, Kaftan Milan |
| Sedlnice                  | <i>E. europaeus</i> | <b>EE03</b> | HM462035 | AF379713 | + | 49,65 | 18,08 | RC | ZS Nový Jičín                                |
| Senohraby                 | <i>E. europaeus</i> | <b>EE03</b> | HM462035 | AF379713 | + | 49,88 | 14,70 | RC | ZS Vlašim                                    |
| Staré město               | <i>E. europaeus</i> | <b>EE03</b> | HM462035 | AF379713 | + | 49,07 | 17,43 | RK | Baláz Vojtěch, Balázová Alena                |
| Studénka                  | <i>E. europaeus</i> | <b>EE03</b> | HM462035 | AF379713 | + | 49,70 | 18,00 | RC | ZS Nový Jičín                                |
| Trutnov                   | <i>E. europaeus</i> | <b>EE03</b> | HM462035 | AF379713 | + | 50,55 | 15,88 | RC | Dvorská Zdena                                |
| Vsetín                    | <i>E. europaeus</i> | <b>EE03</b> | HM462035 | AF379713 | + | 49,32 | 17,98 | RK | Šobotník Jan                                 |
| Germany - Hamburk         | <i>E. europaeus</i> | <b>EE04</b> | HM462036 | -        | + | 53,55 | 9,98  | RC | Petney Trevor                                |
| Germany - Hamburk         | <i>E. europaeus</i> | <b>EE05</b> | HM462037 | AF379714 | + | 53,55 | 9,98  | RC | Petney Trevor                                |
| Germany - Hamburk         | <i>E. europaeus</i> | <b>EE05</b> | HM462037 | AF379714 | + | 53,55 | 9,98  | RC | Petney Trevor                                |
| Germany - Hesse-Frankfurt | <i>E. europaeus</i> | <b>EE06</b> | HM462038 | -        | - | 50,01 | 8,68  | RC | Petney Trevor                                |
| Germany - Hamburk         | <i>E. europaeus</i> | <b>EE07</b> | HM462039 | -        | + | 53,55 | 9,98  | RC | Petney Trevor                                |
| Sokolov                   | <i>E. europaeus</i> | <b>EE07</b> | HM462039 | -        | + | 50,17 | 12,67 | RK | Průšová                                      |
| Spálené Poříčí            | <i>E. europaeus</i> | <b>EE07</b> | HM462039 | -        | + | 49,60 | 13,60 | RC | ČSOP Spálené Poříčí                          |
| Germany - Mnichov         | <i>E. europaeus</i> | <b>EE08</b> | HM462040 | -        | + | 48,13 | 11,56 | RC | Petney Trevor                                |
| Germany - Mnichov         | <i>E. europaeus</i> | <b>EE09</b> | HM462041 | -        | - | 48,13 | 11,56 | RC | Petney Trevor                                |
| Dolní Věstonice           | <i>E. europaeus</i> | <b>EE10</b> | HM462042 | AF379707 | + | 48,88 | 16,63 | RK | Hulva Pavel                                  |
| Havlíčkův Brod            | <i>E. europaeus</i> | <b>EE10</b> | HM462042 | AF379707 | + | 49,60 | 15,57 | RC | ZS Pavlov                                    |
| Jesenice-Horní Říčany     | <i>E. europaeus</i> | <b>EE10</b> | HM462042 | AF379707 | + | 49,93 | 14,53 | RK | Bolfíková Barbora, Hulva Pavel, Kaftan Milan |
| Kopřivnice                | <i>E. europaeus</i> | <b>EE10</b> | HM462042 | AF379707 | + | 49,58 | 18,15 | RC | ZS Nový Jičín                                |
| Ledeč nad Sázavou         | <i>E. europaeus</i> | <b>EE10</b> | HM462042 | AF379707 | - | 49,68 | 15,27 | RC | ZS Pavlov                                    |
| Louny                     | <i>E. europaeus</i> | <b>EE10</b> | HM462042 | AF379707 | + | 50,35 | 13,80 | RC | ZS Falco Dolní Týnec                         |
| Pavlice                   | <i>E. europaeus</i> | <b>EE10</b> | HM462042 | AF379707 | + | 48,97 | 15,90 | RK | Reiter Antonín                               |
| Praha - Kbely             | <i>E. europaeus</i> | <b>EE10</b> | HM462042 | AF379707 | + | 50,13 | 14,55 | RK | Pithartová Tereza                            |
| Zadní Třebáň              | <i>E. europaeus</i> | <b>EE10</b> | HM462042 | AF379707 | + | 49,90 | 14,20 | RC | Dvorská Zdena                                |
| Ždírec nad Doubravou      | <i>E. europaeus</i> | <b>EE10</b> | HM462042 | AF379707 | - | 49,68 | 15,77 | RC | ZS Pavlov                                    |

|                          |                     |      |          |          |   |       |       |    |                                                |
|--------------------------|---------------------|------|----------|----------|---|-------|-------|----|------------------------------------------------|
| Ždírec nad Doubravou     | <i>E. europaeus</i> | EE10 | HM462042 | AF379707 | - | 49,68 | 15,77 | RC | ZS Pavlov                                      |
| Blovice                  | <i>E. europaeus</i> | EE11 | HM462043 | AF379706 | + | 49,57 | 13,53 | RC | ČSOP Spálené Poříčí                            |
| Bochov                   | <i>E. europaeus</i> | EE11 | HM462043 | AF379706 | + | 50,13 | 13,03 | RK | Průšová                                        |
| Havlíčkův Brod           | <i>E. europaeus</i> | EE11 | HM462043 | AF379706 | - | 49,60 | 15,57 | RC | ZS Pavlov                                      |
| Chrást                   | <i>E. europaeus</i> | EE11 | HM462043 | AF379706 | + | 49,83 | 14,57 | RC | ZS Vlašim                                      |
| Klatovy                  | <i>E. europaeus</i> | EE11 | HM462043 | AF379706 | + | 49,38 | 13,28 | RC | ČSOP Spálené Poříčí                            |
| Pičín                    | <i>E. europaeus</i> | EE11 | HM462043 | AF379706 | + | 49,73 | 14,05 | RK | Šmíd Jiří                                      |
| Popovičky                | <i>E. europaeus</i> | EE11 | HM462043 | AF379706 | + | 49,95 | 14,58 | RC | ZS Vlašim                                      |
| Praha - Bohnice          | <i>E. europaeus</i> | EE11 | HM462043 | AF379706 | + | 50,12 | 14,42 | RK | Pithartová Tereza                              |
| Praha - Čimice           | <i>E. europaeus</i> | EE11 | HM462043 | AF379706 | + | 50,12 | 14,42 | RK | Pithartová Tereza                              |
| Praha - Kajetánka        | <i>E. europaeus</i> | EE11 | HM462043 | AF379706 | + | 50,08 | 14,37 | RK | Bolfíková Barbora                              |
| Říčany                   | <i>E. europaeus</i> | EE11 | HM462043 | AF379706 | + | 49,98 | 14,65 | RC | ZS Vlašim                                      |
| Spálené Poříčí           | <i>E. europaeus</i> | EE11 | HM462043 | AF379706 | + | 49,60 | 13,60 | RC | ČSOP Spálené Poříčí                            |
| Stod                     | <i>E. europaeus</i> | EE11 | HM462043 | AF379706 | + | 49,63 | 13,15 | RC | ČSOP Spálené Poříčí                            |
| Germany - Karlsruhe      | <i>E. europaeus</i> | EE12 | HM462044 | -        | + | 49,00 | 8,40  | RC | Petney Trevor                                  |
| Chomutov                 | <i>E. europaeus</i> | EE13 | HM462045 | -        | + | 50,45 | 13,40 | RC | Zoopark Chomutov                               |
| Karlovy Vary             | <i>E. europaeus</i> | EE13 | HM462045 | -        | + | 50,23 | 12,87 | RK | Průšová                                        |
| Karlovy Vary - Rybař     | <i>E. europaeus</i> | EE13 | HM462045 | -        | - | 50,23 | 12,87 | RK | Průšová                                        |
| Praha - Ďáblice          | <i>E. europaeus</i> | EE13 | HM462045 | -        | - | 50,13 | 14,47 | C  | Vodička Roman                                  |
| Český Těšín              | <i>E. europaeus</i> | EE14 | HM462046 | -        | + | 49,73 | 18,60 | RK | Hulva Pavel                                    |
| Olomouc                  | <i>E. europaeus</i> | EE14 | HM462046 | -        | + | 49,58 | 17,25 | RC | Zoo Olomouc                                    |
| Orlová                   | <i>E. europaeus</i> | EE14 | HM462046 | -        | + | 49,83 | 18,42 | RC | ZS Nový Jičín                                  |
| Ostrava                  | <i>E. europaeus</i> | EE14 | HM462046 | -        | + | 49,83 | 18,30 | RC | ZS Nový Jičín                                  |
| Ostrava - Vítkovice      | <i>E. europaeus</i> | EE14 | HM462046 | -        | + | 49,80 | 18,27 | RC | ZS Nový Jičín                                  |
| Paskov                   | <i>E. europaeus</i> | EE14 | HM462046 | -        | + | 49,72 | 18,27 | RK | Bolfíková Barbora                              |
| Slovak Republic - Šaštín | <i>E. europaeus</i> | EE14 | HM462046 | -        | + | 48,63 | 17,13 | RK | Ferenc Michal                                  |
| Staré město              | <i>E. europaeus</i> | EE14 | HM462046 | -        | + | 49,07 | 17,43 | RK | Baláz Vojtěch, Balázová Alena                  |
| Valašské Meziříčí        | <i>E. europaeus</i> | EE14 | HM462046 | -        | + | 49,45 | 17,97 | RK | Bolfíková Barbora, Hulva Pavel, Mikulěnka Ruda |
| Blatno                   | <i>E. europaeus</i> | EE15 | HM462047 | AF379705 | + | 50,52 | 13,33 | RK | Matějů Jan                                     |
| Bystřice                 | <i>E. europaeus</i> | EE15 | HM462047 | AF379705 | + | 50,38 | 15,23 | RK | Šandera Martin                                 |
| Česká Lípa               | <i>E. europaeus</i> | EE15 | HM462047 | AF379705 | + | 50,67 | 14,53 | RC | ZS Falco Dolní Týnec                           |
| Germany - Karlsruhe      | <i>E. europaeus</i> | EE15 | HM462047 | AF379705 | + | 49,00 | 8,40  | RC | Petney Trevor                                  |
| Germany - Stocksberg     | <i>E. europaeus</i> | EE15 | HM462047 | AF379705 | + | 49,06 | 9,04  | RC | Petney Trevor                                  |
| Chomutov                 | <i>E. europaeus</i> | EE15 | HM462047 | AF379705 | + | 50,45 | 13,40 | RC | Zoopark Chomutov                               |
| Chomutov                 | <i>E. europaeus</i> | EE15 | HM462047 | AF379705 | + | 50,45 | 13,40 | RC | Zoopark Chomutov                               |
| Chomutov                 | <i>E. europaeus</i> | EE15 | HM462047 | AF379705 | + | 50,45 | 13,40 | RC | Zoopark Chomutov                               |
| Chomutov                 | <i>E. europaeus</i> | EE15 | HM462047 | AF379705 | - | 50,45 | 13,40 | RC | Zoopark Chomutov                               |
| Javorník                 | <i>E. europaeus</i> | EE15 | HM462047 | AF379705 | - | 50,68 | 14,97 | RK | Zahradníček Oldřich                            |
| Karlovy Vary             | <i>E. europaeus</i> | EE15 | HM462047 | AF379705 | + | 50,22 | 12,87 | RK | Matějů Jan                                     |
| Kolinec                  | <i>E. europaeus</i> | EE15 | HM462047 | AF379705 | - | 49,28 | 13,43 | RC | ČSOP Spálené Poříčí                            |
| Kolinec                  | <i>E. europaeus</i> | EE15 | HM462047 | AF379705 | + | 49,28 | 13,43 | RC | ČSOP Spálené Poříčí                            |
| Litoměřice               | <i>E. europaeus</i> | EE15 | HM462047 | AF379705 | + | 50,53 | 14,12 | RC | ZS Falco Dolní Týnec                           |
| Most                     | <i>E. europaeus</i> | EE15 | HM462047 | AF379705 | + | 50,47 | 13,57 | RC | Dvorská Zdena                                  |
| Praha západ              | <i>E. europaeus</i> | EE15 | HM462047 | AF379705 | - | 49,97 | 14,33 | RC | Dvorská Zdena                                  |
| Praha - Nové Butovice    | <i>E. europaeus</i> | EE15 | HM462047 | AF379705 | + | 50,03 | 14,35 | RK | Gvoždík Václav                                 |
| Praha - Suchdol          | <i>E. europaeus</i> | EE15 | HM462047 | AF379705 | + | 50,13 | 14,37 | RK | Šandera Martin                                 |
| Praha - Trója            | <i>E. europaeus</i> | EE15 | HM462047 | AF379705 | + | 50,12 | 14,42 | RK | Pithartová Tereza                              |
| Praha - Trója            | <i>E. europaeus</i> | EE15 | HM462047 | AF379705 | + | 50,12 | 14,42 | RK | Pithartová Tereza                              |
| Přeštice                 | <i>E. europaeus</i> | EE15 | HM462047 | AF379705 | + | 49,57 | 13,32 | RC | ČSOP Spálené Poříčí                            |
| Sokolov                  | <i>E. europaeus</i> | EE15 | HM462047 | AF379705 | + | 50,17 | 12,65 | RK | Schneiderová Irena                             |
| Sokolov - Michal         | <i>E. europaeus</i> | EE15 | HM462047 | AF379705 | + | 50,15 | 12,67 | RK | Leden David                                    |

|                          |                      |             |          |          |   |       |       |    |                                                |
|--------------------------|----------------------|-------------|----------|----------|---|-------|-------|----|------------------------------------------------|
| Sokolov - Michal         | <i>E. europaeus</i>  | <b>EE15</b> | HM462047 | AF379705 | + | 50,15 | 12,67 | RK | Leden David                                    |
| Spálené Poříčí           | <i>E. europaeus</i>  | <b>EE15</b> | HM462047 | AF379705 | + | 49,60 | 13,60 | RC | ČSOP Spálené Poříčí                            |
| Ústí nad Orlicí          | <i>E. europaeus</i>  | <b>EE15</b> | HM462047 | AF379705 | - | 49,97 | 16,38 | RC | ZS Pavlov                                      |
| Valdice                  | <i>E. europaeus</i>  | <b>EE15</b> | HM462047 | AF379705 | + | 50,45 | 15,38 | RK | Šandera Martin                                 |
| Plačkov u Humpolce       | <i>E. europaeus</i>  | <b>EE16</b> | HM462048 | -        | + | 49,52 | 15,38 | RC | ZS Pavlov                                      |
| Germany - Mnichov        | <i>E. europaeus</i>  | <b>EE17</b> | HM462049 | -        | + | 48,13 | 11,56 | RC | Petney Trevor                                  |
| Sicily                   | <i>E. europaeus</i>  | <b>EE18</b> | HM462050 | -        | + | 37,68 | 12,83 | RK | Bolfíková Barbora, Hulva Pavel, Zahradníček O. |
| Portugal - Geres         | <i>E. europaeus</i>  | <b>EE19</b> | HM462051 | AF379748 | + | 41,71 | 8,15  | RK | Gvoždík Václav                                 |
| France                   | <i>E. europaeus</i>  | <b>EE20</b> | HM462052 | -        | - | 44,13 | 4,80  | RK | Šmíd Jiří                                      |
| Aš                       | <i>E. europaeus</i>  | -           | -        | -        | + | 50,22 | 12,18 | RK | Matějů Jan                                     |
| Bílé Karpaty             | <i>E. europaeus</i>  | -           | -        | -        | + | 49,05 | 17,90 | RK | Šobotník Jan                                   |
| Dobřany                  | <i>E. europaeus</i>  | -           | -        | -        | + | 49,65 | 13,28 | RC | ČSOP Spálené Poříčí                            |
| Frahelž                  | <i>E. europaeus</i>  | -           | -        | -        | + | 49,00 | 14,75 | RK | Lučan Radek                                    |
| Germany - Hamburk        | <i>E. europaeus</i>  | -           | -        | -        | + | 53,55 | 9,98  | RC | Petney Trevor                                  |
| Germany - Hamburk        | <i>E. europaeus</i>  | -           | -        | -        | + | 53,55 | 9,98  | RC | Petney Trevor                                  |
| Germany - Karlsruhe      | <i>E. europaeus</i>  | -           | -        | -        | + | 49,00 | 8,40  | RC | Petney Trevor                                  |
| Germany - Mnichov        | <i>E. europaeus</i>  | -           | -        | -        | + | 48,13 | 11,56 | RC | Petney Trevor                                  |
| Golčův Jeníkov           | <i>E. europaeus</i>  | -           | -        | -        | + | 49,80 | 15,47 | RK | Šmíd Jiří                                      |
| Chomutov                 | <i>E. europaeus</i>  | -           | -        | -        | + | 50,45 | 13,40 | RC | Zoopark Chomutov                               |
| Karlovy Vary - Drahovice | <i>E. europaeus</i>  | -           | -        | -        | + | 50,23 | 12,88 | RK | Matějů Jan                                     |
| Kolinec                  | <i>E. europaeus</i>  | -           | -        | -        | + | 49,28 | 13,43 | RC | ČSOP Spálené Poříčí                            |
| Kolinec                  | <i>E. europaeus</i>  | -           | -        | -        | + | 49,28 | 13,43 | RC | ČSOP Spálené Poříčí                            |
| Mořina                   | <i>E. europaeus</i>  | -           | -        | -        | + | 49,95 | 14,2  | RK | Hulva Pavel, Holý Ivo                          |
| Pardubice                | <i>E. europaeus</i>  | -           | -        | -        | + | 50,02 | 15,77 | RC | ZS Pasíčka                                     |
| Praha - Jižní Město      | <i>E. europaeus</i>  | -           | -        | -        | + | 50,02 | 14,48 | RK | Schneiderová Irena                             |
| Praha - Trója            | <i>E. europaeus</i>  | -           | -        | -        | + | 50,12 | 14,42 | RK | Pithartová Tereza                              |
| Praha - Trója            | <i>E. europaeus</i>  | -           | -        | -        | + | 50,12 | 14,42 | RK | Pithartová Tereza                              |
| Příbram                  | <i>E. europaeus</i>  | -           | -        | -        | + | 49,68 | 14,00 | RK | Lučan Radek                                    |
| Vlašim                   | <i>E. europaeus</i>  | -           | -        | -        | + | 49,70 | 14,88 | RC | ZS Vlašim                                      |
| Čelákovice               | <i>E. roumanicus</i> | <b>ER01</b> | HM462024 | AF379753 | + | 50,15 | 14,73 | RK | Hulva Pavel                                    |
| Čelákovice               | <i>E. roumanicus</i> | <b>ER01</b> | HM462024 | AF379753 | + | 50,15 | 14,73 | RK | Pithartová Tereza                              |
| Chomutov                 | <i>E. roumanicus</i> | <b>ER01</b> | HM462024 | AF379753 | + | 50,45 | 13,40 | RC | Zoopark Chomutov                               |
| Krč                      | <i>E. roumanicus</i> | <b>ER01</b> | HM462024 | AF379753 | + | 50,03 | 14,43 | RK | Bolfíková Barbora, Hulva Pavel, Kaftan Milan   |
| Lednice                  | <i>E. roumanicus</i> | <b>ER01</b> | HM462024 | AF379753 | + | 48,78 | 16,78 | C  | Bolfíková Barbora, Hulva Pavel                 |
| Litoměřice               | <i>E. roumanicus</i> | <b>ER01</b> | HM462024 | AF379753 | + | 50,53 | 14,12 | RC | Dvorská Zdena                                  |
| Litoměřice               | <i>E. roumanicus</i> | <b>ER01</b> | HM462024 | AF379753 | + | 50,53 | 14,12 | RC | ZS Falco Dolní Týnec                           |
| Litoměřice               | <i>E. roumanicus</i> | <b>ER01</b> | HM462024 | AF379753 | + | 50,53 | 14,12 | RC | ZS Falco Dolní Týnec                           |
| Olomouc                  | <i>E. roumanicus</i> | <b>ER01</b> | HM462024 | AF379753 | + | 49,58 | 17,25 | RC | Zoo Olomouc                                    |
| Poland - Waršava         | <i>E. roumanicus</i> | <b>ER01</b> | HM462024 | AF379753 | + | 52,23 | 21,00 | RK | Bartonička Tomáš                               |
| Praha 4                  | <i>E. roumanicus</i> | <b>ER01</b> | HM462024 | AF379753 | + | 50,03 | 14,43 | RC | Dvorská Zdena                                  |
| Praha 9                  | <i>E. roumanicus</i> | <b>ER01</b> | HM462024 | AF379753 | + | 50,12 | 14,48 | RC | Dvorská Zdena                                  |
| Praha - Bohnice          | <i>E. roumanicus</i> | <b>ER01</b> | HM462024 | AF379753 | + | 50,12 | 14,42 | RK | Pithartová Tereza                              |
| Praha - Jižní Město      | <i>E. roumanicus</i> | <b>ER01</b> | HM462024 | AF379753 | + | 50,02 | 14,48 | C  | Bolfíková Barbora, Schneiderová Irena          |
| Praha - Jižní Město      | <i>E. roumanicus</i> | <b>ER01</b> | HM462024 | AF379753 | + | 50,02 | 14,48 | C  | Bolfíková Barbora, Schneiderová Irena          |
| Praha - Jižní Město      | <i>E. roumanicus</i> | <b>ER01</b> | HM462024 | AF379753 | + | 50,02 | 14,48 | C  | Bolfíková Barbora, Schneiderová Irena          |
| Praha - Jižní Město      | <i>E. roumanicus</i> | <b>ER01</b> | HM462024 | AF379753 | + | 50,02 | 14,48 | C  | Bolfíková Barbora, Schneiderová Irena          |
| Praha - Jižní Město      | <i>E. roumanicus</i> | <b>ER01</b> | HM462024 | AF379753 | + | 50,02 | 14,48 | C  | Bolfíková Barbora, Schneiderová Irena          |
| Praha - Jižní Město      | <i>E. roumanicus</i> | <b>ER01</b> | HM462024 | AF379753 | + | 50,02 | 14,48 | C  | Bolfíková Barbora, Schneiderová Irena          |
| Praha - Kajetánka        | <i>E. roumanicus</i> | <b>ER01</b> | HM462024 | AF379753 | + | 50,08 | 14,35 | C  | Bolfíková Barbora                              |
| Praha - Kajetánka        | <i>E. roumanicus</i> | <b>ER01</b> | HM462024 | AF379753 | + | 50,08 | 14,35 | C  | Bolfíková Barbora, Hulva Pavel                 |
| Praha - Kajetánka        | <i>E. roumanicus</i> | <b>ER01</b> | HM462024 | AF379753 | + | 50,08 | 14,35 | C  | Bolfíková Barbora, Hulva Pavel                 |

|                                  |                      |      |          |          |   |       |       |    |                                              |
|----------------------------------|----------------------|------|----------|----------|---|-------|-------|----|----------------------------------------------|
| Praha - Prosek                   | <i>E. roumanicus</i> | ER01 | HM462024 | AF379753 | + | 50,12 | 14,48 | C  | Gvoždík Václav                               |
| Praha - Prosek                   | <i>E. roumanicus</i> | ER01 | HM462024 | AF379753 | + | 50,12 | 14,48 | C  | Gvoždík Václav                               |
| Praha - Prosek                   | <i>E. roumanicus</i> | ER01 | HM462024 | AF379753 | + | 50,12 | 14,48 | C  | Gvoždík Václav                               |
| Praha - Staré Bohnice            | <i>E. roumanicus</i> | ER01 | HM462024 | AF379753 | + | 50,12 | 14,42 | RK | Pithartová Tereza                            |
| Praha - Stromovka                | <i>E. roumanicus</i> | ER01 | HM462024 | AF379753 | + | 50,10 | 14,42 | C  | Gvoždík Václav                               |
| Praha - Trója                    | <i>E. roumanicus</i> | ER01 | HM462024 | AF379753 | + | 50,12 | 14,42 | C  | Bolfíková Barbora                            |
| Praha - Trója                    | <i>E. roumanicus</i> | ER01 | HM462024 | AF379753 | + | 50,12 | 14,42 | RK | Pithartová Tereza                            |
| Praha - Trója                    | <i>E. roumanicus</i> | ER01 | HM462024 | AF379753 | + | 50,12 | 14,42 | RK | Pithartová Tereza                            |
| Praha - Viničná                  | <i>E. roumanicus</i> | ER01 | HM462024 | AF379753 | + | 50,07 | 14,42 | RK | Kaftan Milan                                 |
| Praha - Viničná                  | <i>E. roumanicus</i> | ER01 | HM462024 | AF379753 | + | 50,07 | 14,42 | RK | Kaftan Milan                                 |
| Předonín U Štětí                 | <i>E. roumanicus</i> | ER01 | HM462024 | AF379753 | + | 50,43 | 14,32 | RK | Lučan Radek                                  |
| Předonín U Štětí                 | <i>E. roumanicus</i> | ER01 | HM462024 | AF379753 | + | 50,43 | 14,32 | RK | Lučan Radek                                  |
| Rychvald                         | <i>E. roumanicus</i> | ER01 | HM462024 | AF379753 | + | 49,85 | 18,37 | RK | Bolfíková Barbora, Hulva Pavel, Janko Karel  |
| Slovak Republic, Banská Bystrica | <i>E. roumanicus</i> | ER01 | HM462024 | AF379753 | + | 48,72 | 19,13 | RK | Mikulíček Petr                               |
| Slovak Republic, Bratislava      | <i>E. roumanicus</i> | ER01 | HM462024 | AF379753 | + | 48,15 | 17,10 | RK | Varadínová Zuzana                            |
| Slovak Republic, Bratislava      | <i>E. roumanicus</i> | ER01 | HM462024 | AF379753 | + | 48,15 | 17,10 | RK | Mikulíček Petr                               |
| Slovak Republic, Dojč            | <i>E. roumanicus</i> | ER01 | HM462024 | AF379753 | + | 48,67 | 17,25 | RK | Ferenc Michal                                |
| Slovak Republic, Senica          | <i>E. roumanicus</i> | ER01 | HM462024 | AF379753 | + | 48,67 | 17,35 | RK | Mikulíček Petr                               |
| Světlá nad Sázavou               | <i>E. roumanicus</i> | ER01 | HM462024 | AF379753 | + | 49,67 | 15,40 | RC | ZS Pavlov                                    |
| Velké Karlovice                  | <i>E. roumanicus</i> | ER01 | HM462024 | AF379753 | + | 49,35 | 18,27 | RK | Šobotník Jan                                 |
| Velké Meziříčí                   | <i>E. roumanicus</i> | ER01 | HM462024 | AF379753 | + | 49,35 | 15,93 | RC | ZS Pavlov                                    |
| Vratimov                         | <i>E. roumanicus</i> | ER01 | HM462024 | AF379753 | + | 49,77 | 18,30 | RC | ZS Nový Jičín                                |
| Zlonice U Slaného                | <i>E. roumanicus</i> | ER01 | HM462024 | AF379753 | + | 50,28 | 14,08 | RK | Lučan Radek                                  |
| Staré město                      | <i>E. roumanicus</i> | ER02 | HM462025 | -        | + | 49,07 | 17,43 | RK | Baláž Vojtěch, Balážová Alena                |
| Libenice                         | <i>E. roumanicus</i> | ER03 | HM462026 | -        | + | 49,98 | 15,25 | RK | Bolfíková Barbora, Hulva Pavel, Kaftan Milan |
| Znojmo                           | <i>E. roumanicus</i> | ER04 | HM462027 | AF379754 | + | 48,85 | 16,03 | RK | Reiter Antonín                               |
| Bulgaria - Asenovgrad            | <i>E. roumanicus</i> | ER05 | HM462028 | -        | + | 42,00 | 24,86 | RK | Gvoždík Václav                               |
| Slovak Republic, Brusno          | <i>E. roumanicus</i> | ER06 | HM462029 | AF379759 | + | 48,73 | 19,37 | RK | Mikulíček Petr                               |
| Slovak Republic, Poltár          | <i>E. roumanicus</i> | ER06 | HM462029 | AF379759 | + | 48,42 | 19,78 | RK | Ferenc Michal                                |
| Slovak Republic, Radovce         | <i>E. roumanicus</i> | ER06 | HM462029 | AF379759 | + | 48,22 | 19,82 | RK | Ferenc Michal                                |
| Horní Počernice                  | <i>E. roumanicus</i> | ER07 | HM462030 | -        | + | 50,10 | 14,60 | C  | Gvoždík Václav                               |
| Slovak Republic, Cinobaňa        | <i>E. roumanicus</i> | ER07 | HM462030 | -        | + | 48,43 | 19,65 | RK | Ferenc Michal                                |
| Vítonice                         | <i>E. roumanicus</i> | ER07 | HM462030 | -        | + | 48,90 | 16,20 | RK | Reiter Antonín                               |
| Horní Počernice                  | <i>E. roumanicus</i> | -    | -        | -        | + | 50,10 | 14,60 | RK | Gvoždík Václav                               |
| Liběchov                         | <i>E. roumanicus</i> | -    | -        | -        | + | 50,40 | 14,43 | RK | Gvoždík Václav                               |
| Praha-Bohnice                    | <i>E. roumanicus</i> | -    | -        | -        | + | 50,12 | 14,42 | RK | Pithartová Tereza                            |
| Praha-Břevnov                    | <i>E. roumanicus</i> | -    | -        | -        | + | 50,08 | 14,35 | C  | Bolfíková Barbora, Hulva Pavel               |
| Praha-Čimice                     | <i>E. roumanicus</i> | -    | -        | -        | + | 50,12 | 14,42 | RK | Baláž Vojtěch, Balážová Alena                |
| Romania - Silón                  | <i>E. roumanicus</i> | -    | -        | -        | + | 45,60 | 23,46 | C  | Černý Jiří                                   |
| Romania - Silón                  | <i>E. roumanicus</i> | -    | -        | -        | + | 45,60 | 23,46 | C  | Černý Jiří                                   |
| Roudnice nad Labem               | <i>E. roumanicus</i> | -    | -        | -        | + | 50,42 | 14,25 | RC | ZS Falco Dolní Týnec                         |
| Slovak Republic, Radovce         | <i>E. roumanicus</i> | -    | -        | -        | + | 48,22 | 19,82 | RK | Ferenc Michal                                |
| Slovak Republic, Radovce         | <i>E. roumanicus</i> | -    | -        | -        | + | 48,22 | 19,82 | RK | Ferenc Michal                                |

**Appendix A.** List of specimens and localities. Hp, haplotype code; Ac. Num., GenBank Accession Number; Ac. num.\*, GenBank Accession number according to Seddon et al. (2001); M, availability of microsatellite genotype; N, latitude; E, longitude; S, type of the sample (RK=road-kill, RC=rescue center, C=capture); lgt, provider of the sample.

| <b>Locus</b> | <b>GenBank accession no.</b> | <b>Annealing temp. (°C)</b> | <b>fluorescent label</b> | <b>Repeat motif</b> |
|--------------|------------------------------|-----------------------------|--------------------------|---------------------|
| EEU2         | U63911                       | 62                          | PET                      | d(CA)18             |
| EEU3         | U63912                       | 62                          | FAM                      | d(CA)18             |
| EEU4         | U63913                       | 62                          | NED                      | d(CA)19             |
| EEU5         | U63914                       | 56                          | VIC                      | d(CA)24             |
| EEU6         | U63915                       | 56                          | PET                      | d(GA)18             |
| EEU12H       | AF276820                     | 64                          | FAM                      | d(CT)15             |
| EEU37H       | AF276823                     | 64                          | VIC                      | d(GT)23             |
| EEU43H       | AF276824                     | 56                          | FAM                      | d(GT)25 (GA)6       |
| EEU54H       | AF276825                     | 56                          | NED                      | d(GA)31             |

**Appendix B.** Table of microsatellite loci (Locus), their accession numbers (GenBank accession no.), annealing temperatures (Annealing temp.), fluorescent labels and repeat motifs.

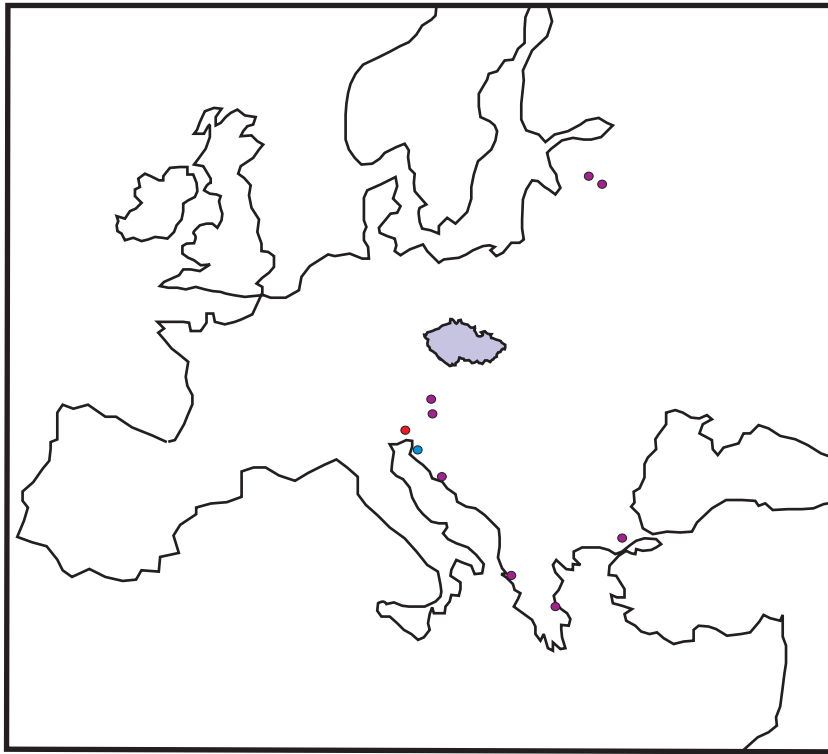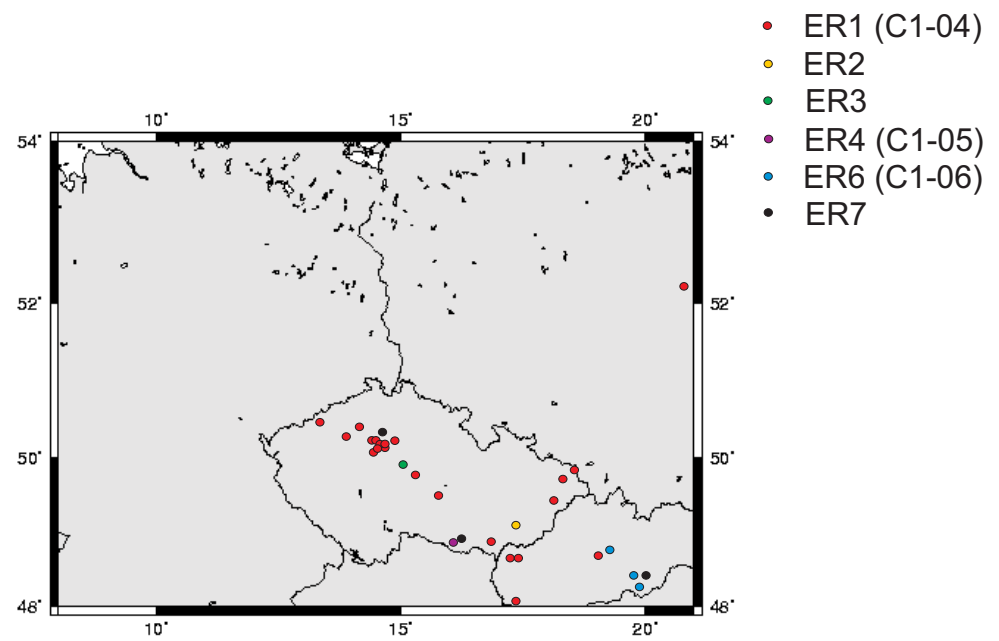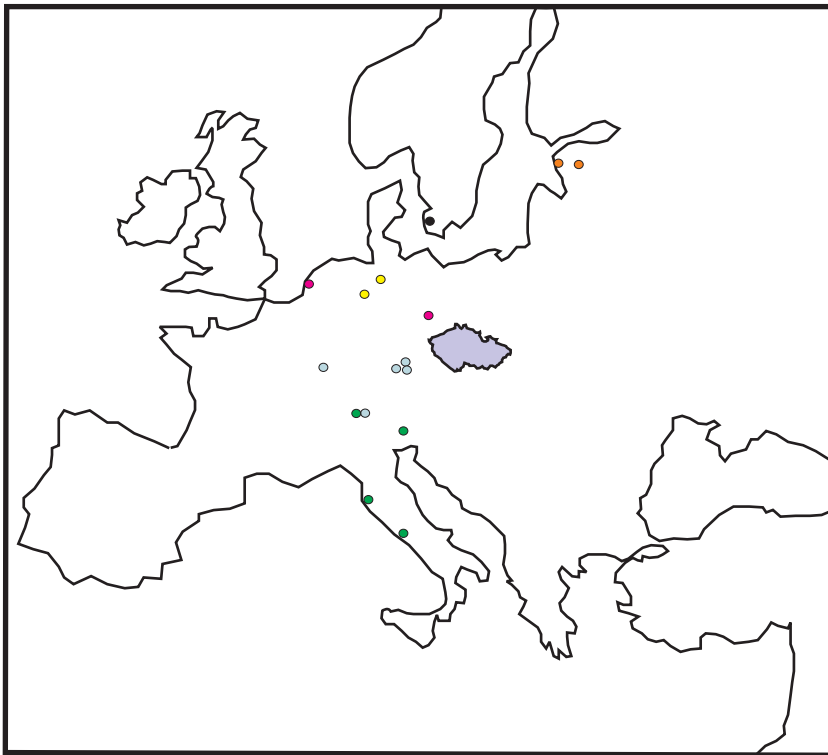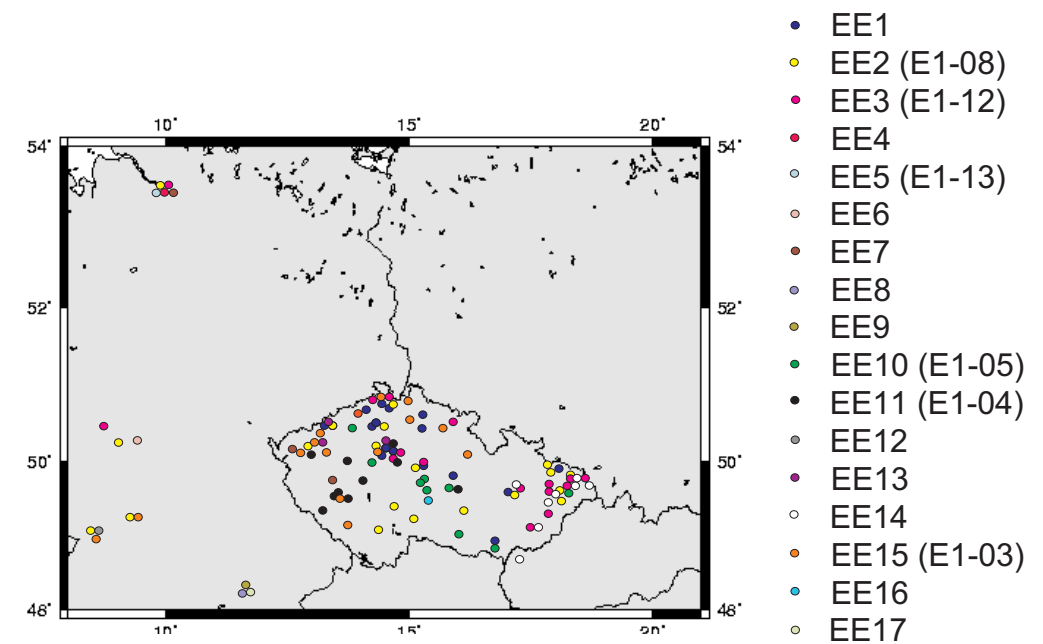

**Appendix C.** Maps of haplotype distribution in Europe according to Seddon *et al.* (2001) on the left and in our study on the right for *E. roumanicus* (at the top) and *E. europaeus* (at the bottom).

1

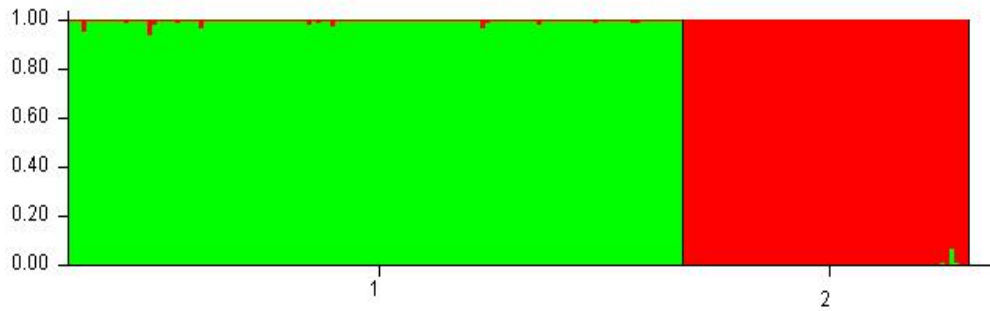

2

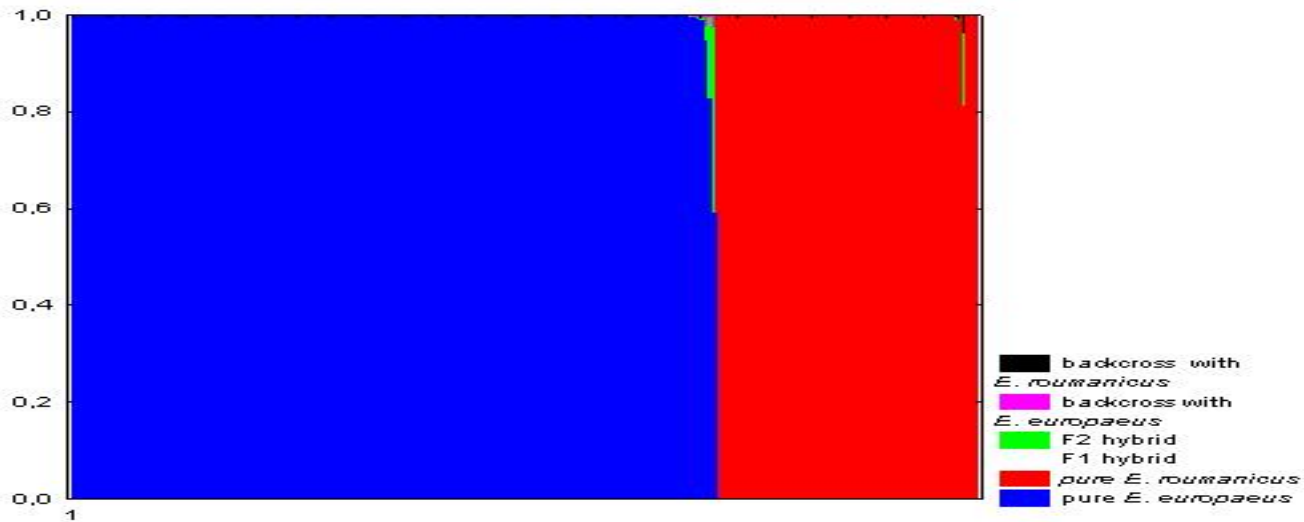

3

|     | Estimated Ln Probability of Data - $\Pr(X K)$ |                      |
|-----|-----------------------------------------------|----------------------|
|     | <i>E. europaeus</i>                           | <i>E. roumanicus</i> |
| K=1 | <b>-3925.0</b>                                | -1760.2              |
| K=2 | -4085.5                                       | <b>-1698.8</b>       |
| K=3 | -3983.7                                       | -1722.3              |
| K=4 | -4048.9                                       | -1722.3              |
| K=5 | -4187.3                                       | -1865.9              |

**Appendix D.** Results of analyses in programs Structure and New Hybrids. 1) Column graph of Bayesian cluster analysis for pooled data with both *Erinaceus europaeus* (green) and *E. roumanicus* (red) genotypes in Structure. Individuals from Czech and Slovak republic are used for this analysis, the result with best ln probability of data (for K=2) are shown. 2) Column graph of NewHybrids results, all individuals sampled in Europe are implemented. Lengths of vertical colour segments are corresponding to posterior probabilities that particular genotype fall into hybrid categories shown on right. 3) Table of estimated ln probability of data resulting from Structure analyses performed separately for *E. europaeus* and *E. roumanicus* datasets. Values of K with highest probability are highlighted.
